# Supplementary material for: New Enhancements for the Exact Solution of the Vehicle Routing Problem with Time Windows
Source: Atypon-hosted journal article supplement (doi:10.1287/ijoc.2016.0744), 2017-06-26
Supplement: ijoc.2016.0744.sm1.pdf [file ijoc.2016.0744.sm1.pdf]

## Appendix

### A. Detailed Results on the Hardest Solomon Instances

Table 5 shows the detailed results on the 14 hardest Solomon instances. In this table, column **Ins** gives the name of the instance. The next five columns describe the instance characteristics: **Q**, the vehicle capacity; **d**, the average customer demand; **H**, the time horizon;  $\bar{t}w$ , the average customer time window width; and **s**, the average customer service time. The next two columns, **UB** and **Ksol**, present the cost of the best known solution and the number of vehicles used in this solution, respectively. The next five columns provide results about the root-node solution process: **RLB**, the lower bound obtained using only robust cuts; **LB**, the lower bound improved by the addition of non-robust rank-1 and elementary cuts; **C**, the number of active rank-1 and elementary cuts (i.e., those with non-zero dual variables) in the root-node solution; **ELB**, the improved root-node lower bound obtained if enumeration succeeds (from this point, only elementary routes are considered, full-memory rank-1 and elementary cuts as well as clique cuts are separated); and **T**, the total time (in seconds) for the root node. The next three columns concern the complete solution process: **B**, the total number of nodes in the branch-and-bound search tree (including the root node); **TT** the total computational time (in seconds); and **OPT**, the optimal value. Finally, column **BMR11** report the computational time obtained by Baldacci et al. (2011). Note that the number of vehicles used in the optimal solutions are the same as those provided in column **Ksol**.

| Ins   | Q    | d    | H    | $\bar{t}w$ | s    | UB     | Ksol | RLB    | LB     | C   | ELB    | T     | B | TT    | OPT    | BMR11  |
|-------|------|------|------|------------|------|--------|------|--------|--------|-----|--------|-------|---|-------|--------|--------|
| C203  | 700  | 18.1 | 3390 | 1715.8     | 90.0 | 588.7  | 3    | 588.7  | 588.7  | 0   | -      | 365   | 1 | 365   | 588.7  | 32     |
| C204  | 700  | 18.1 | 3390 | 2493.6     | 90.0 | 588.1  | 3    | 588.1  | 588.1  | 0   | -      | 1648  | 1 | 1648  | 588.1  | 182    |
| RC204 | 1000 | 17.2 | 960  | 718.1      | 10.0 | 783.5  | 4    | 776.5  | 780.9  | 56  | 783.4  | 1167  | 1 | 1167  | 783.5  | 1052   |
| RC207 | 1000 | 17.2 | 960  | 350.5      | 10.0 | 962.9  | 6    | 941.6  | 957.3  | 111 | 962.9  | 347   | 1 | 347   | 962.9  | 26903  |
| RC208 | 1000 | 17.2 | 960  | 472.9      | 10.0 | 776.1  | 4    | 763.6  | 774.3  | 93  | 776.1  | 599   | 1 | 599   | 776.1  | 1193   |
| R202  | 1000 | 14.6 | 1000 | 329.8      | 10.0 | 1029.6 | 8    | 1016.5 | 1026.5 | 40  | 1029.3 | 316   | 1 | 316   | 1029.6 | 3406   |
| R203  | 1000 | 14.6 | 1000 | 542.7      | 10.0 | 870.8  | 6    | 859.7  | 869.0  | 40  | 870.8  | 565   | 1 | 565   | 870.8  | 2139   |
| R204  | 1000 | 14.6 | 1000 | 752.3      | 10.0 | 731.3  | 5    | 720.2  | 729.7  | 89  | 731.1  | 1495  | 1 | 1495  | 731.3  | 216367 |
| R206  | 1000 | 14.6 | 1000 | 423.4      | 10.0 | 875.9  | 5    | 860.0  | 873.9  | 105 | 875.7  | 546   | 1 | 546   | 875.9  | 6675   |
| R207  | 1000 | 14.6 | 1000 | 604.0      | 10.0 | 794.0  | 4    | 780.5  | 791.9  | 79  | 794.0  | 728   | 1 | 728   | 794.0  | 1401   |
| R208  | 1000 | 14.6 | 1000 | 784.3      | 10.0 | 701.0  | 4    | 691.1  | 698.1  | 150 | -      | 13828 | 5 | 64105 | 701.0  | -      |
| R209  | 1000 | 14.6 | 1000 | 350.5      | 10.0 | 854.8  | 5    | 837.2  | 851.7  | 141 | 854.3  | 599   | 1 | 599   | 854.8  | 4496   |
| R210  | 1000 | 14.6 | 1000 | 384.3      | 10.0 | 900.5  | 6    | 881.3  | 897.1  | 157 | 900.5  | 729   | 1 | 729   | 900.5  | 39711  |
| R211  | 1000 | 14.6 | 1000 | 472.9      | 10.0 | 746.7  | 4    | 731.1  | 745.9  | 216 | 746.7  | 1320  | 1 | 1320  | 746.7  | 10993  |

**Table 5** Detailed results on the hardest Solomon instances.

## B. Detailed Results on 200-Customer Gehring and Homberger Instances

Tables 6 to 10 report detailed results for all 60 Gehring and Homberger instances with 200 customers, grouped by class. The labels in these tables are the same as in Table 5. An underlined value in column **OPT** indicates that it differs from the upper bound given in column **UB**. A time limit of four days was allowed before aborting the execution of the algorithm. For the instances that could not be solved within this time frame, only the root-node results are presented. Note that, for instance RC2-2-4, we used  $NG = 10$  because, with  $NG = 20$ , the solution process stalled before adding non-robust cuts.

| Ins    | Q   | d    | H    | $t\bar{w}$ | s    | UB     | Ksol | RLB    | LB     | C   | ELB    | T   | B | TT  | OPT    |
|--------|-----|------|------|------------|------|--------|------|--------|--------|-----|--------|-----|---|-----|--------|
| C1-2-1 | 200 | 17.6 | 1351 | 61.4       | 90.0 | 2698.6 | 20   | 2698.6 | 2698.6 | 0   | -      | 20  | 1 | 20  | 2698.6 |
| C1-2-2 | 200 | 17.6 | 1351 | 348.3      | 90.0 | 2694.3 | 20   | 2694.3 | 2694.3 | 0   | -      | 44  | 1 | 44  | 2694.3 |
| C1-2-3 | 200 | 17.6 | 1351 | 634.1      | 90.0 | 2675.8 | 20   | 2659.7 | 2663.8 | 55  | -      | 179 | 7 | 626 | 2675.8 |
| C1-2-4 | 200 | 17.6 | 1351 | 920.1      | 90.0 | 2625.6 | 19   | 2619.7 | 2625.4 | 118 | 2625.6 | 340 | 1 | 340 | 2625.6 |
| C1-2-5 | 200 | 17.6 | 1351 | 120.3      | 90.0 | 2694.9 | 20   | 2694.9 | 2694.9 | 0   | -      | 24  | 1 | 24  | 2694.9 |
| C1-2-6 | 200 | 17.6 | 1351 | 158.8      | 90.0 | 2694.9 | 20   | 2694.9 | 2694.9 | 0   | -      | 26  | 1 | 26  | 2694.9 |
| C1-2-7 | 200 | 17.6 | 1351 | 181.0      | 90.0 | 2694.9 | 20   | 2694.9 | 2694.9 | 0   | -      | 22  | 1 | 22  | 2694.9 |
| C1-2-8 | 200 | 17.6 | 1351 | 240.3      | 90.0 | 2684.0 | 20   | 2684.0 | 2684.0 | 0   | -      | 28  | 1 | 28  | 2684.0 |
| C1-2-9 | 200 | 17.6 | 1351 | 361.0      | 90.0 | 2639.6 | 19   | 2639.4 | 2639.6 | 1   | -      | 84  | 1 | 84  | 2639.6 |
| C1-210 | 200 | 17.6 | 1351 | 480.7      | 90.0 | 2624.7 | 19   | 2619.7 | 2619.7 | 0   | 2624.7 | 113 | 1 | 113 | 2624.7 |

**Table 6** Detailed results on 200-customer Gehring and Homberger instances of class C1.

| Ins     | Q   | d    | H   | $\bar{t}w$ | s    | UB     | Ksol | RLB    | LB     | C   | ELB    | T    | B   | TT     | OPT    |
|---------|-----|------|-----|------------|------|--------|------|--------|--------|-----|--------|------|-----|--------|--------|
| RC1-2-1 | 200 | 17.8 | 634 | 31.0       | 10.0 | 3516.9 | 20   | 3459.6 | 3499.1 | 368 | 3500.7 | 690  | 25  | 2530   | 3516.9 |
| RC1-2-2 | 200 | 17.8 | 634 | 166.1      | 10.0 | 3221.6 | 19   | 3176.7 | 3204.4 | 387 | 3208.4 | 2487 | 71  | 11427  | 3221.6 |
| RC1-2-3 | 200 | 17.8 | 634 | 301.7      | 10.0 | 3001.4 | 18   | 2949.5 | 2980.7 | 488 | -      | 2536 | 59  | 65745  | 3001.4 |
| RC1-2-4 | 200 | 17.8 | 634 | 437.1      | 10.0 | 2845.2 | 18   | 2809.1 | 2832.8 | 417 | -      | 6031 | 5   | 23001  | 2845.2 |
| RC1-2-5 | 200 | 17.8 | 634 | 65.7       | 10.0 | 3325.6 | 19   | 3271.4 | 3310.0 | 462 | 3314.6 | 5925 | 15  | 8584   | 3325.6 |
| RC1-2-6 | 200 | 17.8 | 634 | 61.0       | 10.0 | 3300.7 | 19   | 3254.5 | 3289.0 | 408 | 3295.8 | 1144 | 3   | 1606   | 3300.7 |
| RC1-2-7 | 200 | 17.8 | 634 | 92.4       | 10.0 | 3177.8 | 19   | 3112.3 | 3150.0 | 471 | -      | 5345 | 179 | 188414 | 3177.8 |
| RC1-2-8 | 200 | 17.8 | 634 | 120.2      | 10.0 | 3060.0 | 18   | 3017.4 | 3044.8 | 419 | 3051.5 | 6953 | 11  | 10215  | 3060.0 |
| RC1-2-9 | 200 | 17.8 | 634 | 121.0      | 10.0 | 3074.8 | 18   | 3000.7 | 3035.7 | 500 | -      | 7633 | -   | -      | -      |
| RC1-210 | 200 | 17.8 | 634 | 151.0      | 10.0 | 2990.5 | 18   | 2932.6 | 2966.0 | 585 | -      | 7994 | -   | -      | -      |

**Table 7** Detailed results on the 200-customer Gehring and Homberger instances of class RC1.

| Ins    | Q   | d    | H   | $\bar{t}w$ | s    | UB     | Ksol | RLB    | LB     | C   | ELB    | T    | B   | TT    | OPT           |
|--------|-----|------|-----|------------|------|--------|------|--------|--------|-----|--------|------|-----|-------|---------------|
| R1-2-1 | 200 | 17.6 | 634 | 11.0       | 10.0 | 4667.2 | 23   | 4655.0 | 4665.3 | 18  | 4665.3 | 59   | 1   | 59    | 4667.2        |
| R1-2-2 | 200 | 17.6 | 634 | 151.2      | 10.0 | 3919.9 | 20   | 3907.2 | 3919.9 | 135 | -      | 162  | 1   | 162   | 3919.9        |
| R1-2-3 | 200 | 17.6 | 634 | 291.0      | 10.0 | 3373.9 | 18   | 3320.5 | 3352.2 | 466 | -      | 2807 | 157 | 93367 | 3373.9        |
| R1-2-4 | 200 | 17.6 | 634 | 432.0      | 10.0 | 3047.6 | 18   | 3000.0 | 3032.0 | 448 | -      | 2007 | 33  | 18026 | 3047.6        |
| R1-2-5 | 200 | 17.6 | 634 | 31.0       | 10.0 | 4053.2 | 20   | 4006.8 | 4043.9 | 248 | 4044.6 | 207  | 3   | 445   | 4053.2        |
| R1-2-6 | 200 | 17.6 | 634 | 166.2      | 10.0 | 3559.2 | 19   | 3492.4 | 3543.0 | 446 | 3547.9 | 4138 | 21  | 7201  | <u>3559.1</u> |
| R1-2-7 | 200 | 17.6 | 634 | 301.0      | 10.0 | 3141.9 | 18   | 3099.2 | 3136.9 | 371 | 3139.6 | 1002 | 1   | 1002  | 3141.9        |
| R1-2-8 | 200 | 17.6 | 634 | 437.0      | 10.0 | 2938.4 | 18   | 2901.7 | 2929.7 | 384 | 2934.3 | 1817 | 5   | 2499  | 2938.4        |
| R1-2-9 | 200 | 17.6 | 634 | 61.1       | 10.0 | 3734.7 | 19   | 3676.9 | 3724.8 | 364 | 3727.9 | 484  | 5   | 771   | 3734.7        |
| R1-210 | 200 | 17.6 | 634 | 125.5      | 10.0 | 3293.1 | 18   | 3243.9 | 3276.9 | 409 | 3281.0 | 1827 | 25  | 5010  | 3293.1        |

**Table 8** Detailed results on the 200-customer Gehring and Homberger instances of class R1.

| Ins    | Q   | d    | H    | $\bar{t}w$ | s    | UB     | Ksol | RLB    | LB     | C   | ELB | T      | B | TT    | OPT    |
|--------|-----|------|------|------------|------|--------|------|--------|--------|-----|-----|--------|---|-------|--------|
| C2-2-1 | 700 | 18.9 | 3598 | 161.0      | 90.0 | 1922.1 | 7    | 1915.0 | 1922.1 | 147 | -   | 860    | 1 | 860   | 1922.1 |
| C2-2-2 | 700 | 18.9 | 3598 | 986.0      | 90.0 | 1851.4 | 7    | 1839.4 | 1851.4 | 116 | -   | 5377   | 1 | 5377  | 1851.4 |
| C2-2-3 | 700 | 18.9 | 3598 | 1811.6     | 90.0 | 1763.4 | 7    | 1737.1 | 1752.1 | 194 | -   | 30283  | - | -     | -      |
| C2-2-4 | 700 | 18.9 | 3598 | 2635.3     | 90.0 | 1695.0 | 7    | 1652.3 | 1665.4 | 218 | -   | 142466 | - | -     | -      |
| C2-2-5 | 700 | 18.9 | 3598 | 321.0      | 90.0 | 1869.6 | 7    | 1860.7 | 1869.6 | 99  | -   | 1428   | 1 | 1428  | 1869.6 |
| C2-2-6 | 700 | 18.9 | 3598 | 507.3      | 90.0 | 1844.8 | 7    | 1840.7 | 1844.8 | 113 | -   | 2043   | 1 | 2043  | 1844.8 |
| C2-2-7 | 700 | 18.9 | 3598 | 631.5      | 90.0 | 1842.2 | 6    | 1835.6 | 1842.2 | 39  | -   | 2673   | 1 | 2673  | 1842.2 |
| C2-2-8 | 700 | 18.9 | 3598 | 641.0      | 90.0 | 1813.7 | 6    | 1808.2 | 1813.7 | 79  | -   | 2542   | 1 | 2542  | 1813.7 |
| C2-2-9 | 700 | 18.9 | 3598 | 852.6      | 90.0 | 1815.0 | 7    | 1801.2 | 1815.0 | 206 | -   | 7284   | 1 | 7284  | 1815.0 |
| C2-210 | 700 | 18.9 | 3598 | 881.0      | 90.0 | 1791.2 | 7    | 1770.3 | 1791.2 | 198 | -   | 10560  | 1 | 10560 | 1791.2 |

**Table 9** Detailed results on the Gehring and Homberger instances of class C2.

| Ins     | Q    | d    | H    | $\bar{t}w$ | s    | UB     | Ksol | RLB    | LB     | C   | ELB    | T      | B | TT    | OPT           |
|---------|------|------|------|------------|------|--------|------|--------|--------|-----|--------|--------|---|-------|---------------|
| RC2-2-1 | 1000 | 17.8 | 2535 | 121.0      | 10.0 | 2797.4 | 9    | 2789.1 | 2797.4 | 15  | -      | 2149   | 1 | 2149  | 2797.4        |
| RC2-2-2 | 1000 | 17.8 | 2535 | 709.4      | 10.0 | 2481.6 | 9    | 2458.9 | 2478.0 | 110 | -      | 12101  | 3 | 17423 | 2481.6        |
| RC2-2-3 | 1000 | 17.8 | 2535 | 1297.3     | 10.0 | 2227.7 | 8    | 2199.5 | 2227.7 | 280 | -      | 48725  | 1 | 48725 | 2227.7        |
| RC2-2-4 | 1000 | 17.8 | 2535 | 1885.6     | 10.0 | 1854.8 | 7    | 1785.5 | 1849.6 | 212 | -      | 345490 | - | -     | -             |
| RC2-2-5 | 1000 | 17.8 | 2535 | 280.1      | 10.0 | 2493.5 | 8    | 2478.9 | 2491.4 | 78  | -      | 5117   | 1 | 5117  | <u>2491.4</u> |
| RC2-2-6 | 1000 | 17.8 | 2535 | 241.0      | 10.0 | 2496.3 | 9    | 2472.4 | 2495.1 | 120 | -      | 5584   | 1 | 5584  | <u>2495.1</u> |
| RC2-2-7 | 1000 | 17.8 | 2535 | 370.8      | 10.0 | 2287.7 | 7    | 2270.6 | 2286.4 | 119 | -      | 27734  | 3 | 29505 | 2287.7        |
| RC2-2-8 | 1000 | 17.8 | 2535 | 486.4      | 10.0 | 2151.2 | 6    | 2138.4 | 2150.3 | 95  | 2151.2 | 83101  | 1 | 83101 | 2151.2        |
| RC2-2-9 | 1000 | 17.8 | 2535 | 481.0      | 10.0 | 2086.6 | 6    | 2053.6 | 2072.0 | 121 | -      | 344990 | - | -     | -             |
| RC2-210 | 1000 | 17.8 | 2535 | 601.0      | 10.0 | 1989.2 | 5    | 1946.0 | 1966.7 | 110 | -      | 357497 | - | -     | -             |

**Table 10** Detailed results on the 200-customer Gehring and Homberger instances of class RC2.

| Ins    | Q    | d    | H    | $\bar{t}w$ | s    | UB     | Ksol | RLB    | LB     | C   | ELB    | T      | B | TT    | OPT    |
|--------|------|------|------|------------|------|--------|------|--------|--------|-----|--------|--------|---|-------|--------|
| R2-2-1 | 1000 | 17.6 | 2535 | 122.2      | 10.0 | 3468.0 | 13   | 3462.5 | 3468.0 | 31  | -      | 2083   | 1 | 2083  | 3468.0 |
| R2-2-2 | 1000 | 17.6 | 2535 | 709.7      | 10.0 | 3008.2 | 11   | 3000.6 | 3008.2 | 30  | -      | 4065   | 1 | 4065  | 3008.2 |
| R2-2-3 | 1000 | 17.6 | 2535 | 1297.3     | 10.0 | 2537.5 | 9    | 2515.5 | 2537.5 | 188 | -      | 21011  | 1 | 21011 | 2537.5 |
| R2-2-4 | 1000 | 17.6 | 2535 | 1884.1     | 10.0 | 1928.5 | 5    | 1917.9 | 1925.0 | 112 | -      | 141826 | - | -     | -      |
| R2-2-5 | 1000 | 17.6 | 2535 | 241.0      | 10.0 | 3061.1 | 8    | 3029.0 | 3061.1 | 205 | -      | 6316   | 1 | 6316  | 3061.1 |
| R2-2-6 | 1000 | 17.6 | 2535 | 800.2      | 10.0 | 2675.4 | 8    | 2645.6 | 2675.0 | 144 | 2675.1 | 14672  | 1 | 14672 | 2675.4 |
| R2-2-7 | 1000 | 17.6 | 2535 | 1358.3     | 10.0 | 2304.7 | 7    | 2277.7 | 2304.7 | 233 | -      | 44174  | 1 | 44174 | 2304.7 |
| R2-2-8 | 1000 | 17.6 | 2535 | 1915.0     | 10.0 | 1842.4 | 4    | 1810.7 | 1831.6 | 134 | -      | 346022 | - | -     | -      |
| R2-2-9 | 1000 | 17.6 | 2535 | 374.1      | 10.0 | 2843.3 | 9    | 2820.6 | 2843.3 | 117 | -      | 5031   | 1 | 5031  | 2843.3 |
| R2-210 | 1000 | 17.6 | 2535 | 477.5      | 10.0 | 2549.4 | 8    | 2526.5 | 2546.3 | 194 | -      | 9678   | 3 | 11659 | 2549.4 |

**Table 11** Detailed results on the 200-customer Gehring and Homberger instances of class R2.
